# Supplementary material
Source: Springer Nature journal article supplement (https://www.springermedizin.de/resource/supplementary/12885_2006_590_MOESM4_ESM.pdf/9469838)

A.

GRANTA-519

MCL patients

1 2 3 4 5 6

Cyclin D1a  
Cyclin D1b

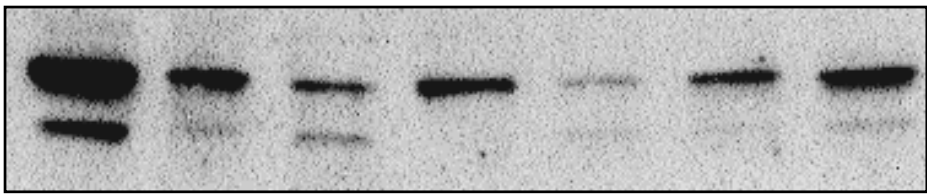

36 kDa  
31 kDa

B.

NCEB-1  
JeKo-1  
HBL-2  
GRANTA-519

Cyclin D1b

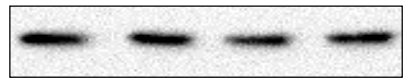

Cyclin D1a

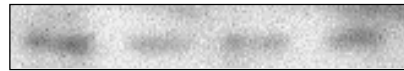

$\beta$ -tubulin

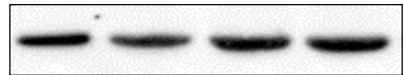

Supplement: MOESM4 [file 9469838]
